# Supplementary material for: Substance P-Mediated Vascular Protection Ameliorates Bone Loss
Source: Hindawi journal article supplement (doi:10.1155/2023/9903336), 2023-04-29

# Supplementary Figure 1

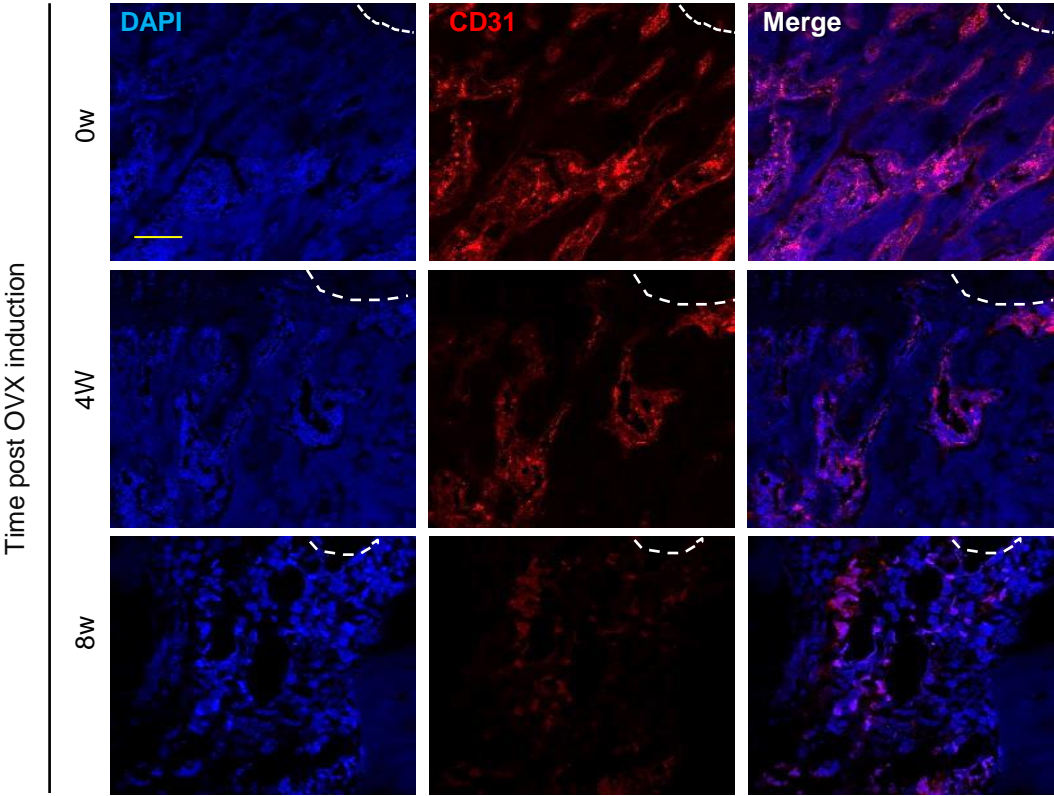

# Supplementary Figure 2

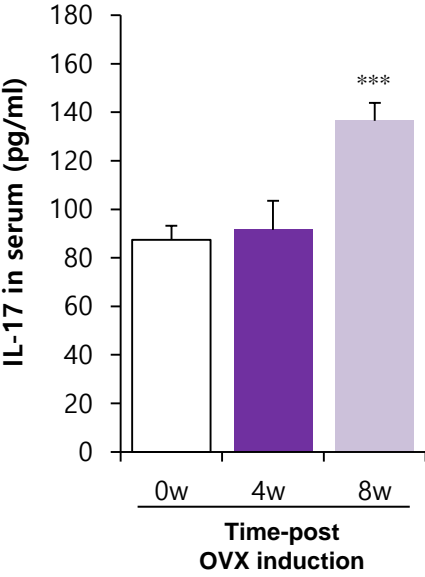

# Supplementary Figure 3

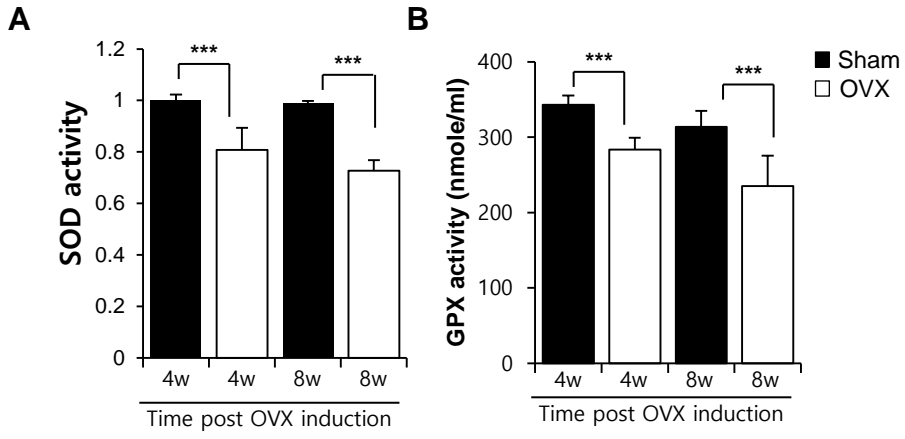

# Supplementary Figure 4

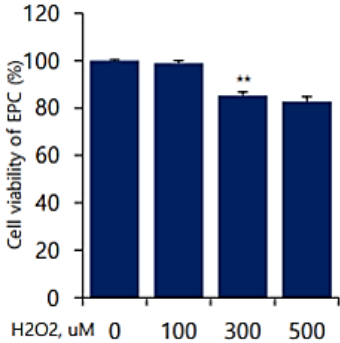

# Supplementary Figure 5

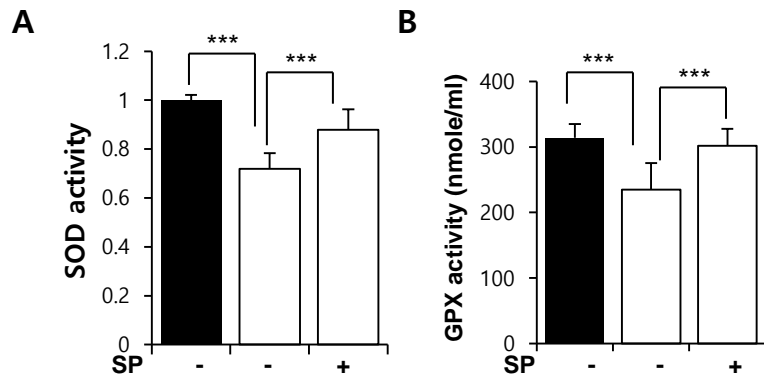

# Supplementary Figure 6

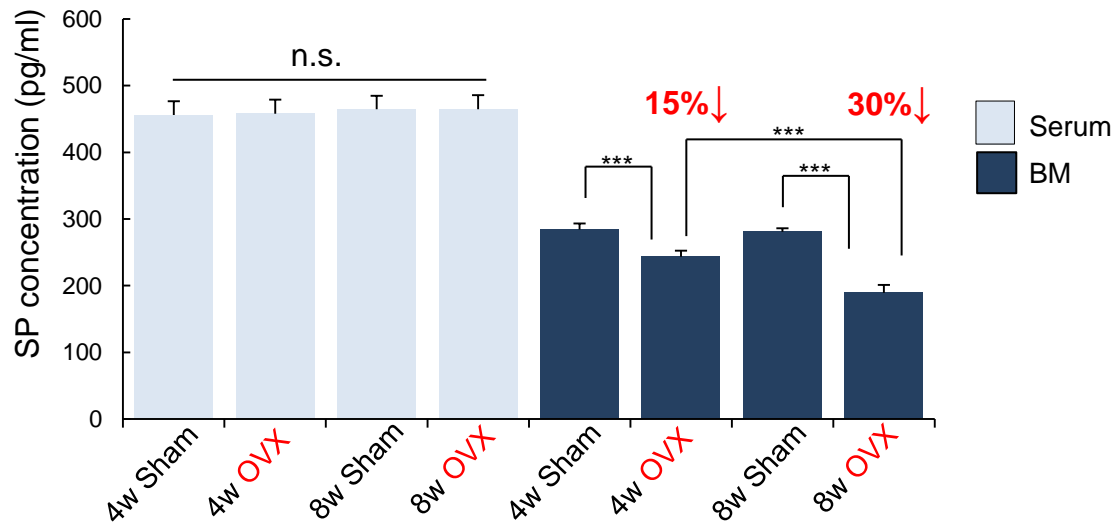

# Supplementary Figure 7

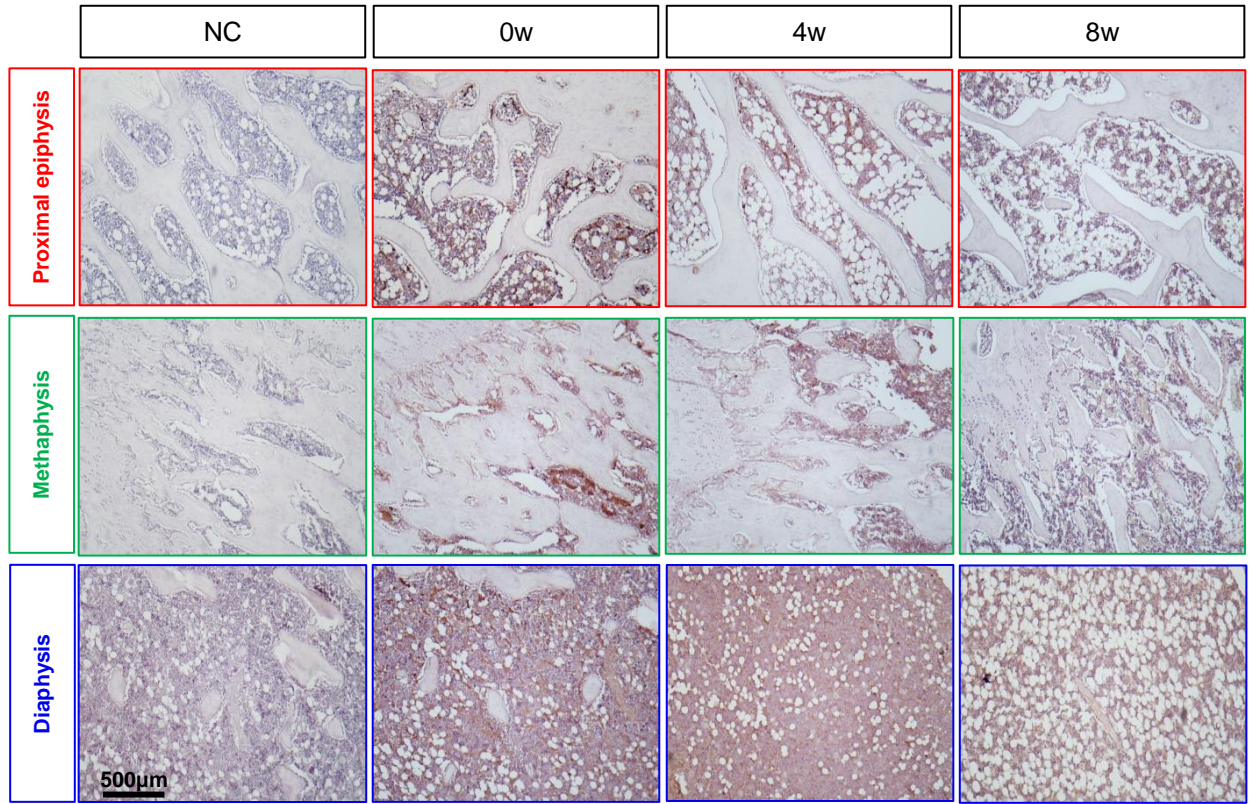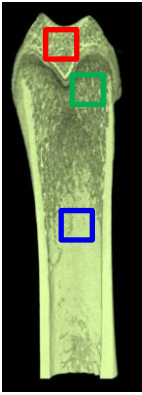



# Supplementary Figure 8

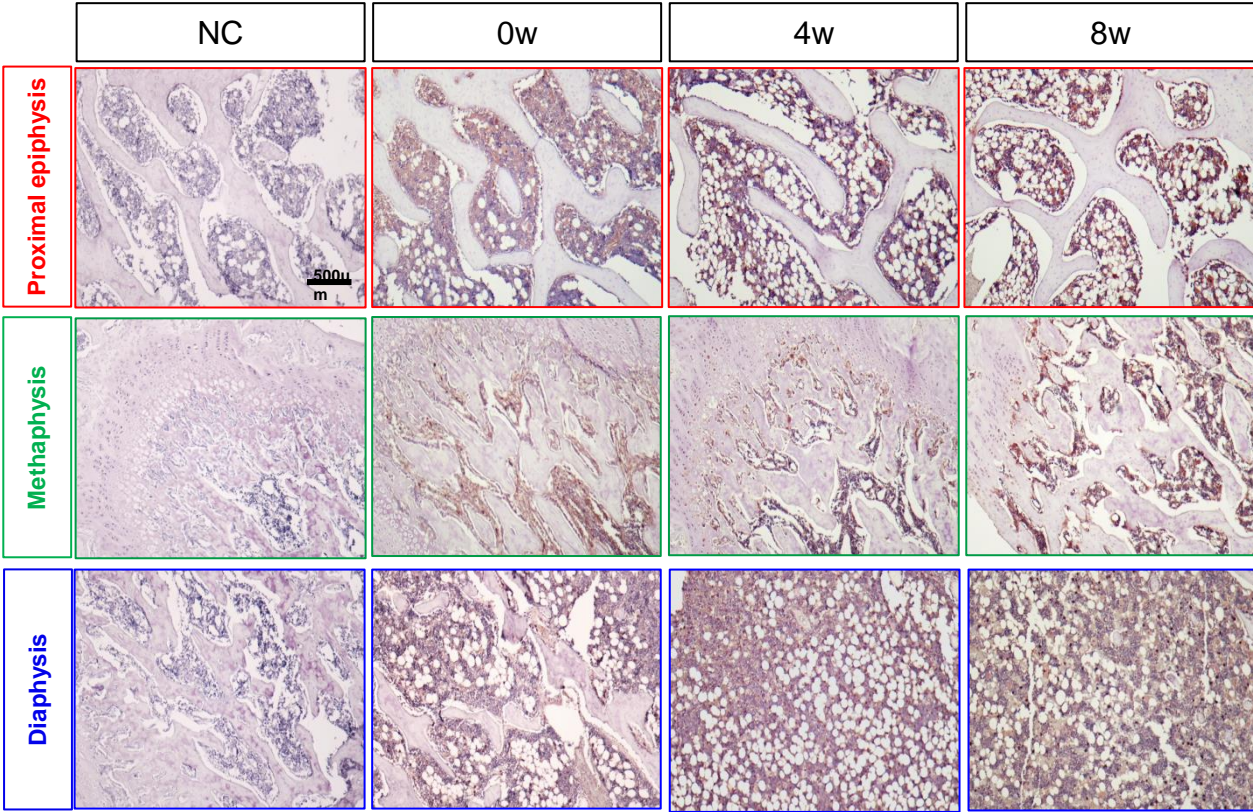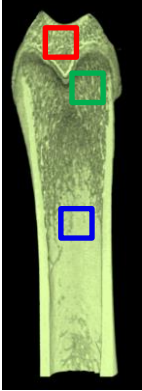

Supplement: f1 [file 9903336.f1.pdf]
